# Supplementary material for: Whole-brain in situ mapping of neuronal activation in Drosophila during social behaviors and optogenetic stimulation
Source: eLife. 2024 Nov 28;12:RP92380. doi: 10.7554/eLife.92380 (PMC11604218; doi:10.7554/eLife.92380)
Supplement: Supplementary file 1. [file elife-92380-supp1.xlsx]

## Sheet: Sheet1
Figure	Names used in the manuscript	Fly strains	Source	Identifier	FlyBase ID
Figure 1	fruitless-GAL4 / Fru-GAL4	fruGAL4	Stockinger et al., 2005	N/A	FBal0179808
Figure 1 - Supplement	BDPG4uw / empty-GAL4	BDPG4uw	Rubin Lab	N/A	N/A
	UAS-Chrimson::tdT	20xUAS-IVS-Syn21-Chrimson::tdTomato3.1 (attP2)	Rubin Lab	N/A	FBtp0145778
Figure 2	P1a-GAL4	R15A01-p65.AD (attP40)	Bloomington Drosophila Stock Center	BDSC_68837	FBtp0112075
Figure 2 - Supplement		71G01-GAL4.DBD (attP2)	Bloomington Drosophila Stock Center	BDSC_69507	FBst0069507
	Tk-GAL4	Tk-GAL41	Asahina et al., 2014	N/A	FBtp0087661
	aSP2-GAL4	R47A04-GAL4 (attP2)	Rubin Lab / Watanabe et al., 2017, Bloomington Drosophila Stock Center	BDSC_50286	FBtp0060571
	UAS-myr::GFP	10xUAS-IVS-myr::GFP (attP2)	Bloomington Drosophila Stock Center	BDSC_32197	FBst0032197
Figure 3	P1a-GAL4	R15A01-p65.AD (attP40)	Bloomington Drosophila Stock Center	BDSC_68837	FBtp0112075
Figure 3 - Supplement		R71G01-GAL4.DBD (attP2)	Bloomington Drosophila Stock Center	BDSC_69507	FBst0069507
	BDPG4uw / empty-GAL4	BDPG4uw	Rubin Lab	N/A
	UAS-Chrimson::tdT	20xUAS-IVS-Syn21-Chrimson::tdTomato3.1 (attP2)	Rubin Lab	N/A	FBtp0145778
	15A01-LexA	R15A01-iLexA (attP40)	This study	N/A	N/A
	LexAop-Chrimson::tdT	13xLexAop2-IVS-Syn21-Chrimson::tdTomato3.1 (su(Hw)attP5)	Rubin Lab / Chiu et al., 2021	N/A	N/A
	pCd-GAL4 / R41A01	R41A01-GAL4 (attP2)	Bloomington Drosophila Stock Center	BDSC_39425	FBst0039425
	OK107	OK107	Bloomington Drosophila Stock Center	BDSC_854	FBst0000854
	0273	0273-GAL4	InSITE collection, Burke et al., 2012	N/A	FBti0152522
	Ddc-GAL4	Ddc-GAL4	Bloomington Drosophila Stock Center	BDSC_7010	FBst0007010
	UAS-myr::GFP	10xUAS-IVS-myr::GFP (attP2)	Bloomington Drosophila Stock Center	BDSC_32197	FBst0032197
	UAS-GCaMP7b	20xUAS-IVS-jGCaMP7b (VK00005)	Bloomington Drosophila Stock Center	BDSC_79029	FBst0079029
Figure 4	P1a-GAL4	R15A01-p65.AD (attP40)	Bloomington Drosophila Stock Center	BDSC_68837	FBtp0112075
Figure 4 - Supplement		R71G01-GAL4.DBD (attP2)	Bloomington Drosophila Stock Center	BDSC_69507	FBst0069507
	UAS-Chrimson::tdT	20xUAS-IVS-Syn21-Chrimson::tdTomato3.1 (attP2)	Rubin Lab	N/A	FBtp0145778
